# Supplementary material for: Quantification of Enteric Dysfunction in Cystic Fibrosis: Inter- and Intraindividual Variability
Source: PubMed Central journal article supplement (PMC10869934; doi:10.1016/j.jpeds.2023.113800), 2024-02

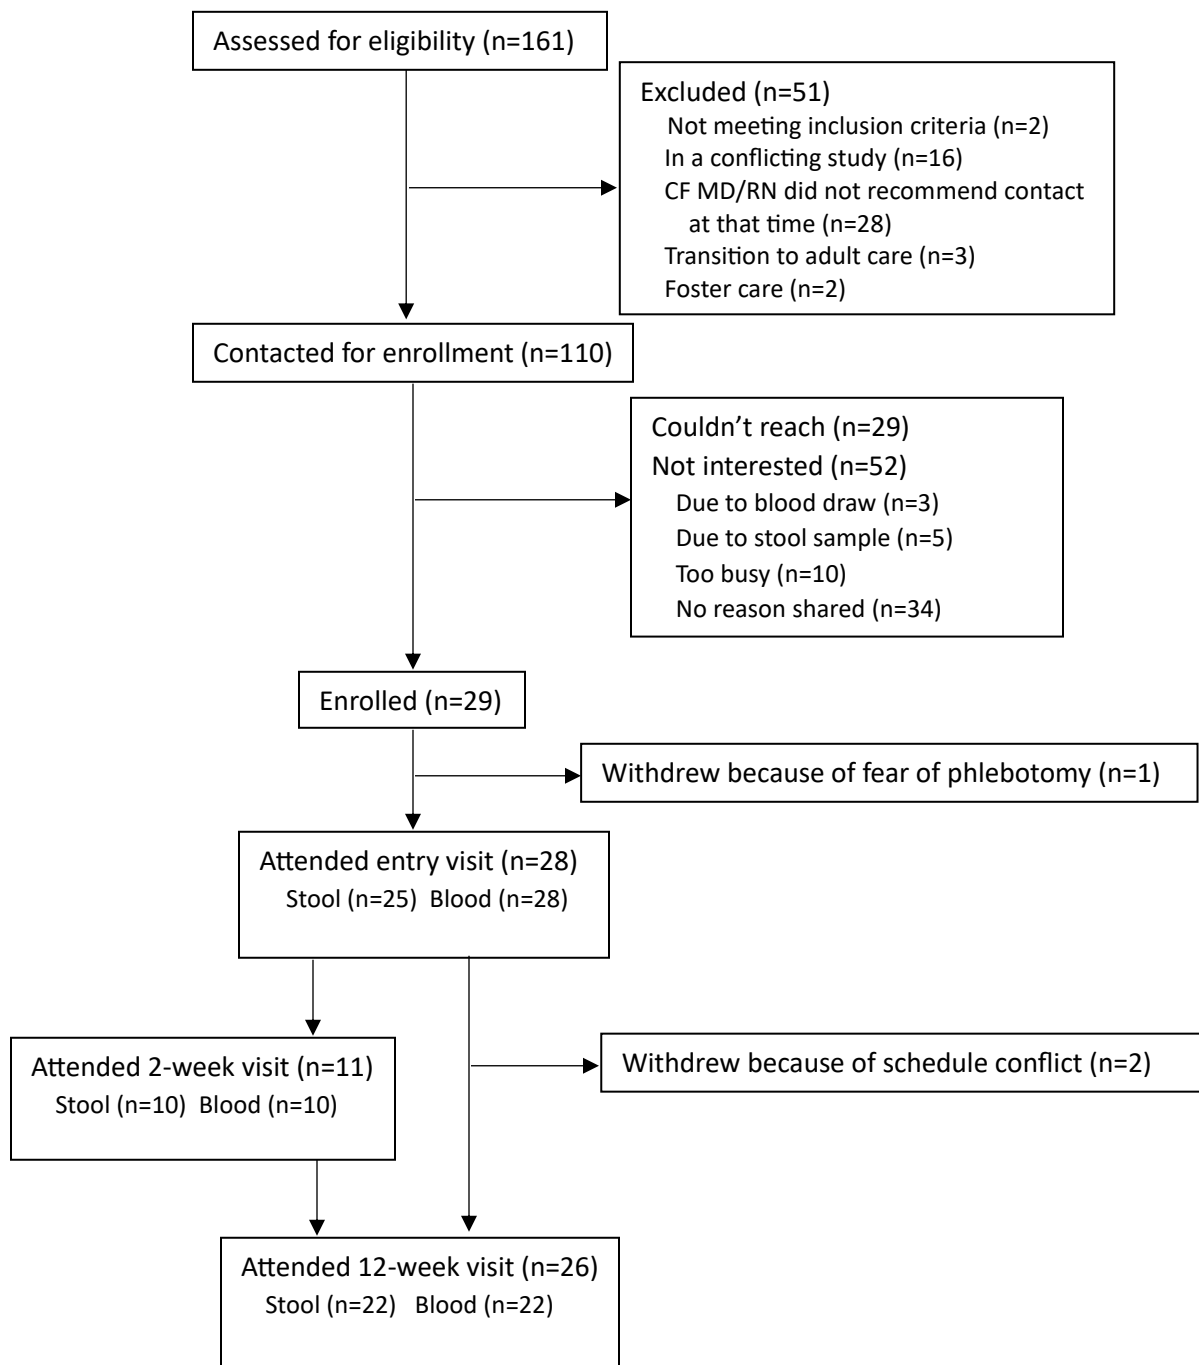

Supplement: mmc3.pdf [file mmc3.pdf]
